# Supplementary material for: A porous Zn(ii)-coordination polymer based on a tetracarboxylic acid exhibiting selective CO2 adsorption and iodine uptake
Source: Royal Society of Chemistry journal article supplement (doi:10.1039/d0dt01875a), 2020-01-01
Supplement: d0dt01875a1.pdf [file d0dt01875a1.pdf]

**A A porous Zn(II)-coordination polymer based on tetracarboxylic acid exhibiting  
selective CO<sub>2</sub> adsorption and iodine uptake**

**Mürsel Arici<sup>a,\*</sup>, Tuğba Alp Arici<sup>b</sup>, Hakan Demiral<sup>c</sup>, Murat Taş<sup>d</sup> and Okan Zafer Yeşilel<sup>a</sup>**

<sup>a</sup>Department of Chemistry, Faculty of Science and Letters, Eskişehir Osmangazi University,  
26040 Eskişehir, Turkey

<sup>b</sup>Department of Chemical Technology, Emet Vocational School, Kütahya Dumlupınar  
University, 43700, Kütahya, Turkey

<sup>c</sup>Department of Chemical Engineering, Faculty of Engineering and Architecture, Eskişehir  
Osmangazi University, 26040 Eskişehir, Turkey

<sup>d</sup>Department of Science Education, Education Faculty, Ondokuz Mayıs University, 55139,  
Samsun, Turkey

**Contents:**

**Table and Figure Captions**

**Table S1.** Selected bond distance (Å) and angle (°) data for **1**

**Table S2.** Selected bond distance (Å) and angle (°) data for **2**

**Table S3.** Selected bond distance (Å) and angle (°) data for **2a@I<sub>2</sub>**

**Fig. S1. a)** The coordination environments of the Zn(II) ions in the paddle-wheel cluster **(b)**

View of the 3D framework of [Zn<sub>2</sub>(abtc)] (1,4-betib ligands removed for clarity) **(c)** Space-  
filling mode of 3D structure in **1** and **2** along the c-axis

**Fig. S2.** PXRD patterns of simulated and as-synthesized compounds

**Fig. S3.** PXRD patterns of compound **2** before and after fully activation at 140°C

**Fig. S4.** N<sub>2</sub> adsorption-desorption isotherms of **2a** at 77 K

**Fig. S5.** The photographs of I<sub>2</sub> adsorption of **2a** in cyclohexane with time

**Fig. S6.** The color change of **2a** after exposure to I<sub>2</sub> vapor at 75°C

**Fig. S7. (a)** IR spectra of **2a** before and after I<sub>2</sub> adsorption in solution and vapor phase **(b)**  
PXRD patterns of **2a**, **2a@I<sub>2</sub>(solvent)**, **2a@I<sub>2</sub>(vapor)** and **2a@I<sub>2</sub>(desorption)**

**Fig. S8. (a)** I<sub>2</sub> release of **2a@I<sub>2</sub>** (10 mg) into methanol (10 mL) with time **(b)** the curve of I<sub>2</sub>  
desorption vs time

**Table S1.** Selected bond distance (Å) and angle (°) data for **1**

|                                        |             |                                         |             |
|----------------------------------------|-------------|-----------------------------------------|-------------|
| Zn1–Zn1 <sup>i</sup>                   | 3.0880 (4)  | Zn1–N1                                  | 2.0090 (17) |
| Zn1–O1                                 | 2.0331 (14) | Zn1–O3 <sup>iii</sup>                   | 2.0384 (14) |
| Zn1–O4 <sup>ii</sup>                   | 2.0500 (15) | Zn1–O2 <sup>i</sup>                     | 2.0508 (14) |
| O1–Zn1–Zn1 <sup>i</sup>                | 83.99 (5)   | N1–Zn1–O4 <sup>ii</sup>                 | 100.08 (7)  |
| O1–Zn1–O4 <sup>ii</sup>                | 85.33 (7)   | N1–Zn1–O3 <sup>iii</sup>                | 104.78 (7)  |
| O1–Zn1–O3 <sup>iii</sup>               | 87.52 (7)   | N1–Zn1–O2 <sup>i</sup>                  | 99.55 (7)   |
| O1–Zn1–O2 <sup>i</sup>                 | 154.92 (7)  | O3 <sup>iii</sup> –Zn1–Zn1 <sup>i</sup> | 74.07 (5)   |
| O4 <sup>ii</sup> –Zn1–Zn1 <sup>i</sup> | 81.50 (5)   | O3 <sup>iii</sup> –Zn1–O4 <sup>ii</sup> | 155.12 (7)  |
| O4 <sup>ii</sup> –Zn1–O2 <sup>i</sup>  | 86.10 (7)   | O3 <sup>iii</sup> –Zn1–O2 <sup>i</sup>  | 90.45 (7)   |
| N1–Zn1–Zn1 <sup>i</sup>                | 170.80 (5)  | O2 <sup>i</sup> –Zn1–Zn1 <sup>i</sup>   | 71.44 (5)   |
| N1–Zn1–O1                              | 105.14 (7)  |                                         |             |

**Symmetry codes:** (i)  $-x+3/2, -y+1/2, -z+2$ ; (ii)  $x, -y+1, z+1/2$ ; (iii)  $-x+3/2, y-1/2, -z+3/2$ ; (iv)  $x, -y+1, z-1/2$ ; (v)  $-x+1, -y+1, -z+1$ ; (vi)  $-x+3/2, y+1/2, -z+3/2$ ; (vii)  $-x+1, y, -z+3/2$ .

**Table S2.** Selected bond distance (Å) and angle (°) data for **2**

|                                         |             |                                       |             |
|-----------------------------------------|-------------|---------------------------------------|-------------|
| Zn1–Zn1 <sup>i</sup>                    | 3.0826 (7)  | Zn1–O1                                | 2.036 (2)   |
| Zn1–O4 <sup>ii</sup>                    | 2.040 (3)   | Zn1–O2 <sup>i</sup>                   | 2.044 (3)   |
| Zn1–O3 <sup>iii</sup>                   | 2.059 (2)   | Zn1–N1                                | 2.007 (3)   |
| O4 <sup>ii</sup> –Zn1–Zn1 <sup>i</sup>  | 84.56 (8)   | O1–Zn1–O2 <sup>i</sup>                | 155.13 (12) |
| O4 <sup>ii</sup> –Zn1–O3 <sup>iii</sup> | 155.19 (12) | O2 <sup>i</sup> –Zn1–Zn1 <sup>i</sup> | 81.07 (8)   |
| O4 <sup>ii</sup> –Zn1–O2 <sup>i</sup>   | 85.83 (14)  | N1–Zn1–Zn1 <sup>i</sup>               | 170.83 (10) |
| O3 <sup>iii</sup> –Zn1–Zn1 <sup>i</sup> | 71.09 (8)   | N1–Zn1–O4 <sup>ii</sup>               | 104.61 (13) |
| O1–Zn1–Zn1 <sup>i</sup>                 | 74.52 (8)   | N1–Zn1–O3 <sup>iii</sup>              | 99.77 (12)  |
| O1–Zn1–O4 <sup>ii</sup>                 | 87.18 (13)  | N1–Zn1–O1                             | 105.56 (13) |
| O1–Zn1–O3 <sup>iii</sup>                | 90.73 (12)  | N1–Zn1–O2 <sup>i</sup>                | 99.30 (13)  |
| O2 <sup>i</sup> –Zn1–O3 <sup>iii</sup>  | 85.77 (13)  |                                       |             |

**Symmetry codes:** (i)  $-x+3/2, -y+3/2, -z+1$ ; (ii)  $-x+3/2, y+1/2, -z+3/2$ ; (iii)  $x, -y+1, z-1/2$ ; (iv)  $-x+3/2, y-1/2, -z+3/2$ ; (v)  $x, -y+1, z+1/2$ ; (vi)  $-x+1, -y+1, -z+1$ ; (vii)  $-x+2, y, -z+3/2$ .

**Table S3.** Selected bond distance (Å) and angle (°) data for **2a@I<sub>2</sub>**

|                                         |             |                                        |           |
|-----------------------------------------|-------------|----------------------------------------|-----------|
| Zn1–Zn1 <sup>i</sup>                    | 3.0844 (19) | Zn1–N2                                 | 2.007 (8) |
| Zn1–O1                                  | 2.047 (6)   | I1–I1 <sup>vii</sup>                   | 2.54 (2)  |
| Zn1–O3 <sup>ii</sup>                    | 2.047 (6)   | I1–I2                                  | 2.83 (3)  |
| Zn1–O2 <sup>i</sup>                     | 2.050 (6)   | I2–I2 <sup>viii</sup>                  | 2.60 (3)  |
| Zn1–O4 <sup>iii</sup>                   | 2.051 (6)   |                                        |           |
| O1–Zn1–O2 <sup>i</sup>                  | 154.9 (3)   | O2 <sup>i</sup> –Zn1–O4 <sup>iii</sup> | 86.0 (3)  |
| O1–Zn1–O4 <sup>iii</sup>                | 85.4 (3)    | N2–Zn1–O1                              | 105.4 (3) |
| O3 <sup>ii</sup> –Zn1–O1                | 87.4 (3)    | N2–Zn1–O3 <sup>ii</sup>                | 105.1 (3) |
| O3 <sup>ii</sup> –Zn1–O2 <sup>i</sup>   | 90.7 (3)    | N2–Zn1–O2 <sup>i</sup>                 | 99.2 (3)  |
| O3 <sup>ii</sup> –Zn1–O4 <sup>iii</sup> | 155.2 (3)   | N2–Zn1–O4 <sup>iii</sup>               | 99.7 (3)  |

Symmetry codes: (i)  $-x+1/2, -y+3/2, -z$ ; (ii)  $-x+1/2, y+1/2, -z+1/2$ ; (iii)  $x, -y+1, z-1/2$ ; (iv)  $-x+1/2, y-1/2, -z+1/2$ ; (vii)  $-x+1, -y+2, -z+1$ ; (viii)  $-x+1, y, -z+1/2$ .

**Table S4.** Comparison of the I<sub>2</sub> uptake capacity (per formula unit) in selected iodine containing compounds

| Compounds                                                                                                           | I <sub>2</sub> uptake capacity (per formula unit) | Reference        |
|---------------------------------------------------------------------------------------------------------------------|---------------------------------------------------|------------------|
| TMU-16-NH <sub>2</sub>                                                                                              | 0.6                                               | 1                |
| TMU-15                                                                                                              | 3                                                 | 2                |
| MIL-101-NH <sub>2</sub> , CAU-1                                                                                     | 0.71, 0.31                                        | 3                |
| Compound 1                                                                                                          | 1.5                                               | 4                |
| MOF 1'                                                                                                              | 4.2                                               | 5                |
| JLU-Liu14                                                                                                           | 0.5                                               | 6                |
| {[CuII(btz)]·0.5H <sub>2</sub> O} <sub>n</sub>                                                                      | 0.5                                               | 7                |
| [Zn <sub>3</sub> (DLlac) <sub>2</sub> (pybz) <sub>2</sub> ] <sub>n</sub> ·                                          | 3                                                 | 8                |
| ZIF-8                                                                                                               | 1.25                                              | 9                |
| HKUST-1                                                                                                             | 1.75                                              | 10               |
| Azo-bridged porphyrin–phthalocyanine                                                                                | 2.90                                              | 11               |
| {[Zn <sub>2</sub> (μ <sub>4</sub> -ao <sub>2</sub> btc)(μ-pbix) <sub>2</sub> ]·2DMF·8H <sub>2</sub> O} <sub>n</sub> | 1.47                                              | 12               |
| {[Co <sub>2</sub> (μ <sub>8</sub> -abtc)(betib)] <sub>n</sub>                                                       | 1.975                                             | 13               |
| [Cd(L1) <sub>2</sub> (ClO <sub>4</sub> ) <sub>2</sub> ]                                                             | 2                                                 | 14               |
| {[Zn <sub>2</sub> (μ <sub>8</sub> -abtc)(betib)] <sub>n</sub>                                                       | <b>1.975</b>                                      | <b>This work</b> |

**Table S5.** Comparison of the iodine release rate of the selected compounds based on the calibration curve of standard iodine

| Compounds                                                                                                                                            | Release rate/ mol L <sup>-1</sup> min <sup>-1</sup> (×10 <sup>-6</sup> ) | Ref.             |
|------------------------------------------------------------------------------------------------------------------------------------------------------|--------------------------------------------------------------------------|------------------|
| Cu <sub>2</sub> (H <sub>2</sub> O) <sub>2</sub> (Cu <sub>4</sub> I <sub>4</sub> ) <sub>2</sub> (INA) <sub>4</sub> (DABCO) <sub>2</sub> ·2DMA         | 0.288 (0.0875 mg /120 min)                                               | 15               |
| JLU-Liu14b                                                                                                                                           | 0.5                                                                      | 6                |
| [(Cu <sub>2</sub> I)Cu <sub>2</sub> L <sub>2</sub> (H <sub>2</sub> O) <sub>2</sub> ] <sub>2</sub> <sup>2+</sup> ·2NO <sub>3</sub> <sup>-</sup> ·5DMF | 5.2                                                                      | 16               |
| [Cu <sub>4</sub> I <sub>3</sub> (DABCO) <sub>2</sub> ] <sub>3</sub>                                                                                  | 1.4                                                                      | 17               |
| JLU-Liu32                                                                                                                                            | 2.3                                                                      | 18               |
| JLU-31                                                                                                                                               | 0.85                                                                     | 18               |
| <b>{[Zn<sub>2</sub>(μ<sub>8</sub>-abtc)(betib)]}</b>                                                                                                 | <b>0.595</b>                                                             | <b>This work</b> |

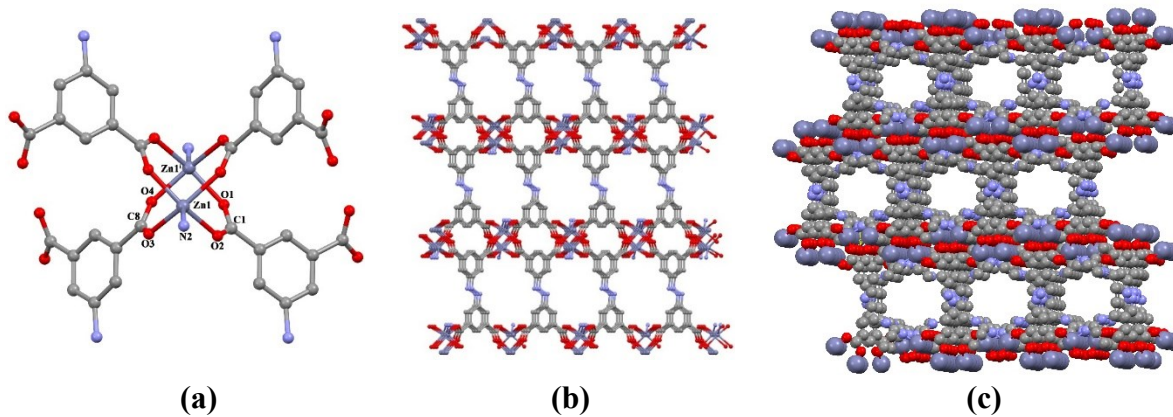

**Fig. S1.** (a) The coordination environments of the Zn(II) ions in the paddle-wheel cluster (b) View of the 3D framework of  $[Zn_2(abtc)]$  (1,4-betib ligands removed for clarity) (c) Space-filling mode of 3D structure in **1** and **2** along the c-axis



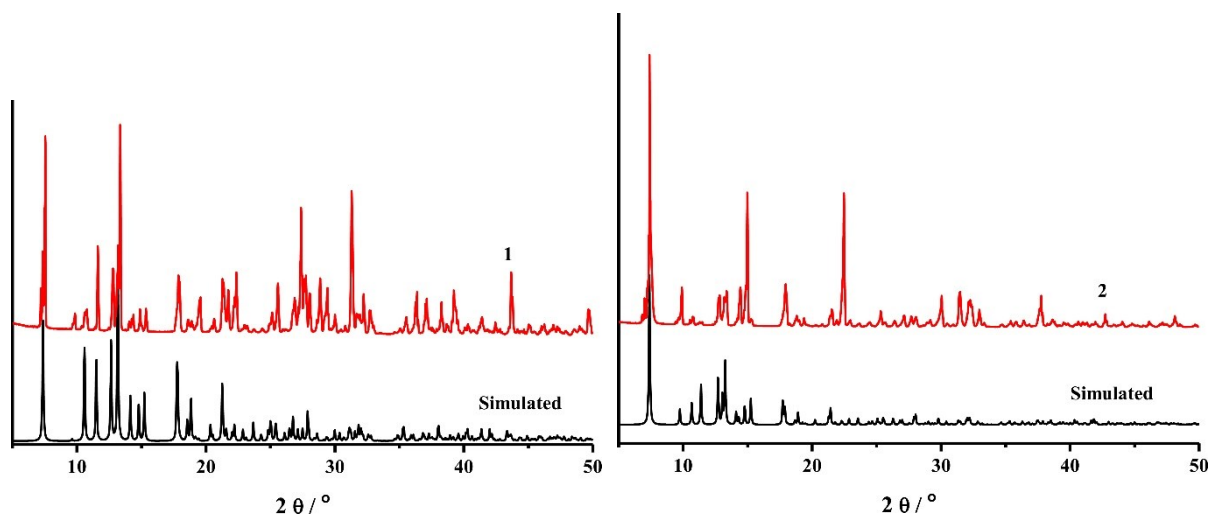

**Fig. S2.** PXRD patterns of simulated and as-synthesized compounds

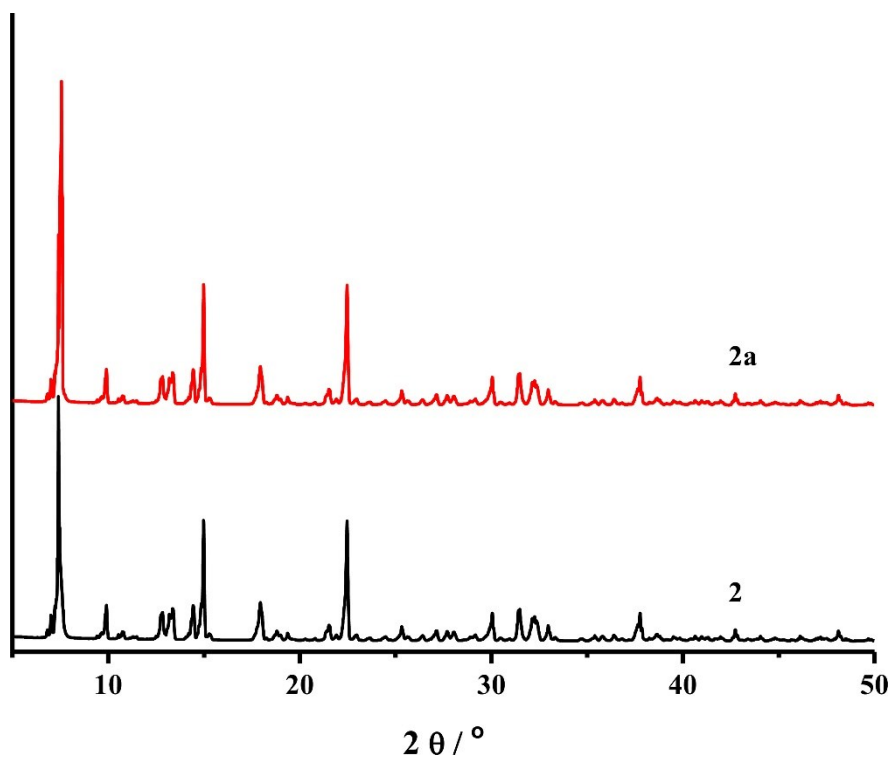

**Fig. S3.** PXRD patterns of compound **2** before and after fully activation at 140°C

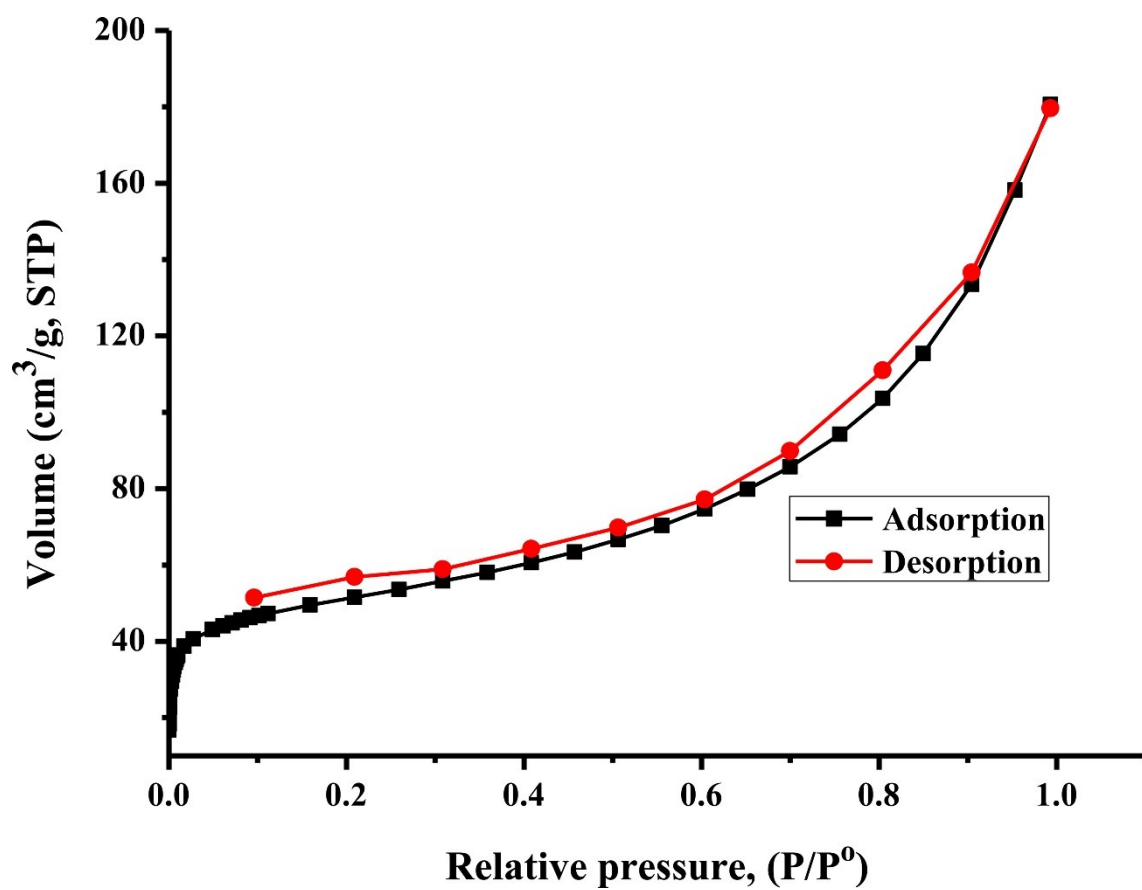

Fig. S4. N<sub>2</sub> adsorption-desorption isotherms of **2a** at 77 K

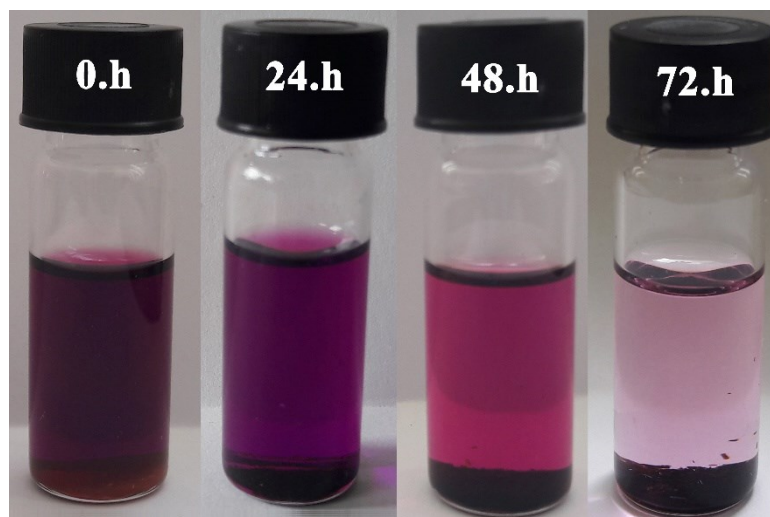

**Fig. S5.** The photographs of I<sub>2</sub> adsorption of **2a** in cyclohexane with time

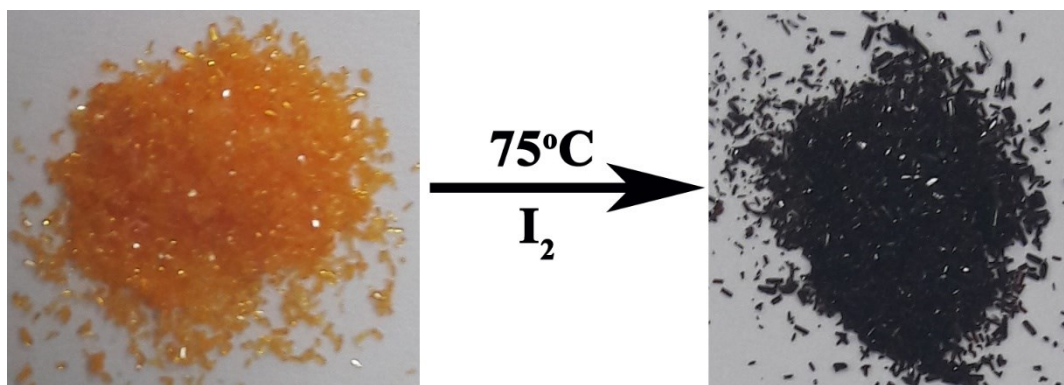

**Fig. S6.** The color change of **2a** after exposure to  $I_2$  vapor at  $75^\circ C$

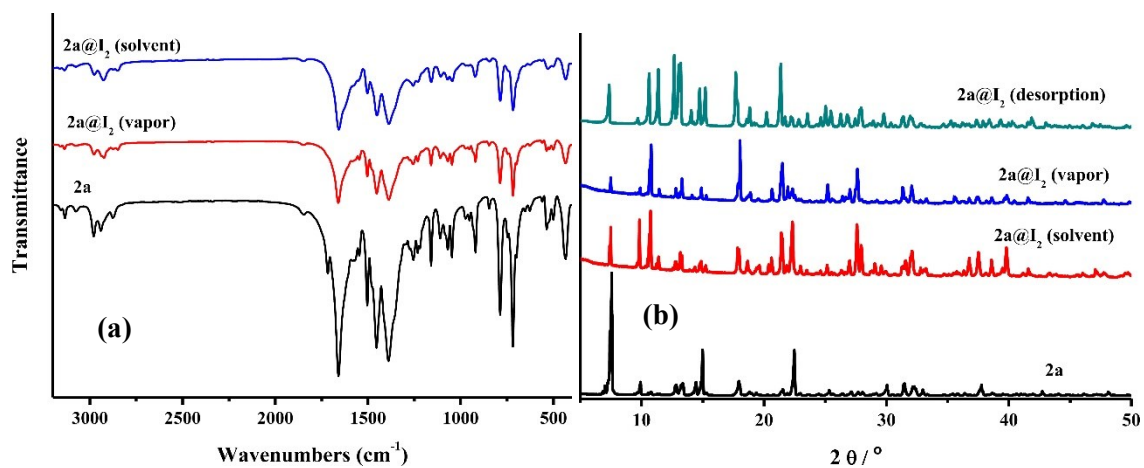

**Fig. S7. (a)** IR spectra of **2a** before and after I<sub>2</sub> adsorption in solution and vapor phase **(b)** PXRD patterns of **2a**, **2a@I<sub>2</sub>(solvent)**, **2a@I<sub>2</sub>(vapor)** and **2a@I<sub>2</sub>(desorption)**

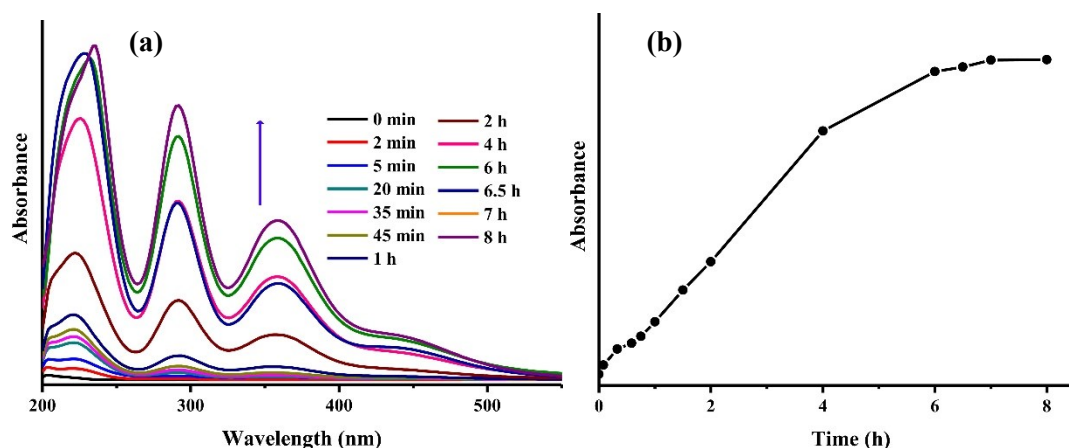

**Fig. S8.** (a) I<sub>2</sub> release of **2a@I<sub>2</sub>** (10 mg) into methanol (10 mL) with time (b) the curve of I<sub>2</sub> desorption vs time

### Notes and references

1. V. Safarifard and A. Morsali, *CrystEngComm*, 2014, **16**, 8660-8663.
2. L. Hashemi and A. Morsali, *CrystEngComm*, 2014, **16**, 4955-4958.
3. C. Falaise, C. Volkringer, J. Facqueur, T. Bousquet, L. Gasnot and T. Loiseau, *Chem. Commun.*, 2013, **49**, 10320-10322.
4. Y. Q. Hu, M. Q. Li, Y. Wang, T. Zhang, P. Q. Liao, Z. Zheng, X. M. Chen and Y. Z. Zheng, *Chem. Eur. J.*, 2017, **23**, 8409-8413.
5. A. K. Chaudhari, S. Mukherjee, S. S. Nagarkar, B. Joarder and S. K. Ghosh, *CrystEngComm*, 2013, **15**, 9465-9471.
6. J. Wang, J. Luo, X. Luo, J. Zhao, D.-S. Li, G. Li, Q. Huo and Y. Liu, *Cryst. Growth Des.*, 2015, **15**, 915-920.
7. P. Cui, L. Ren, Z. Chen, H. Hu, B. Zhao, W. Shi and P. Cheng, *Inorg. Chem.*, 2012, **51**, 2303-2310.
8. M.-H. Zeng, Q.-X. Wang, Y.-X. Tan, S. Hu, H.-X. Zhao, L.-S. Long and M. Kurmoo, *J. Am. Chem. Soc.*, 2010, **132**, 2561-2563.
9. D. F. Sava, M. A. Rodriguez, K. W. Chapman, P. J. Chupas, J. A. Greathouse, P. S. Crozier and T. M. Nenoff, *J. Am. Chem. Soc.*, 2011, **133**, 12398-12401.

10. D. F. Sava, K. W. Chapman, M. A. Rodriguez, J. A. Greathouse, P. S. Crozier, H. Zhao, P. J. Chupas and T. M. Nenoff, *Chem. Mater.*, 2013, **25**, 2591-2596.
11. H. Li, X. Ding and B. H. Han, *Chem. Eur. J.*, 2016, **22**, 11863-11868.
12. M. Arıcı, O. Z. Yeşilel, M. Tas and H. Demiral, *Inorg. Chem.*, 2015, **54**, 11283-11291.
13. M. Arici, O. Z. Yeşilel, M. Taş and H. Demiral, *Cryst. Growth Des.*, 2017, **17**, 2654-2659.
14. Q.-K. Liu, J.-P. Ma and Y.-B. Dong, *Chem. Commun.*, 2011, **47**, 7185-7187.
15. J.-H. Liu, J. Zhang, D. Zhao, L.-D. Lin, Y.-Q. Sun, X.-X. Li and S.-T. Zheng, *CrystEngComm*, 2020, **22**, 821-828.
16. J. Yuan, J. Li, L. Kan, L. Zou, J. Zhao, D.-S. Li, G. Li, L. Zhang and Y. Liu, *C Cryst. Growth Des.*, 2018, **18**, 5449-5455.
17. B. Xin, G. Zeng, L. Gao, Y. Li, S. Xing, J. Hua, G. Li, Z. Shi and S. Feng, *Dalton Trans.*, 2013, **42**, 7562-7568.
18. S. Yao, X. Sun, B. Liu, R. Krishna, G. Li, Q. Huo and Y. Liu, *JJ. Mater. Chem. A*, 2016, **4**, 15081-15087.
